# Supplementary material for: Evaluation of the 7th and 8th editions of the AJCC/UICC TNM staging systems for lung cancer in a large North American cohort
Source: PubMed Central journal article supplement (PMC5620136; doi:10.18632/oncotarget.18158), 2017-05-24
Supplement: oncotarget-08-66784-s001.pdf [file oncotarget-08-66784-s001.pdf]

# Evaluation of the 7<sup>th</sup> and 8<sup>th</sup> editions of the AJCC/UICC TNM staging systems for lung cancer in a large North American cohort

## Supplementary Material

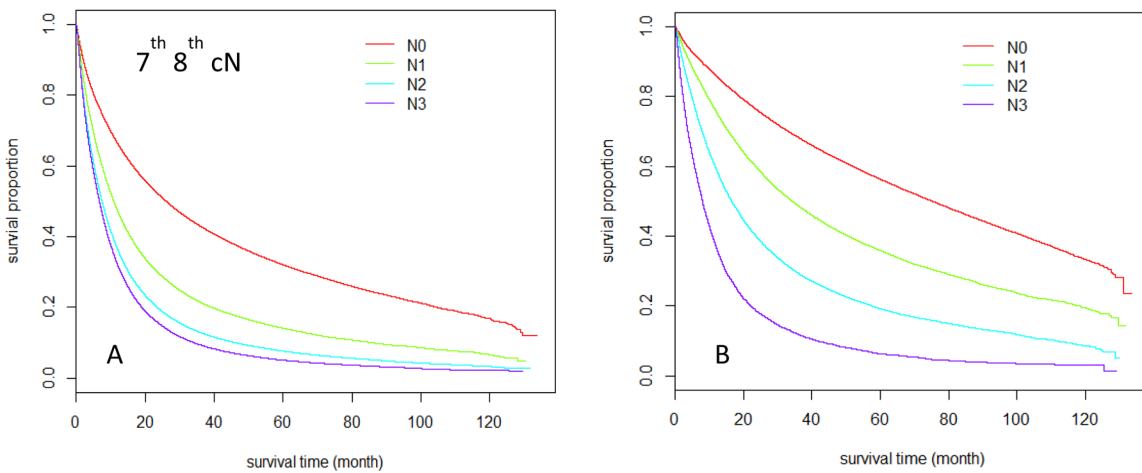

Supplementary Figure 1: Kaplan-Meier Survival curves comparison among different clinical N (cN) and pathological N (pN) stages both in the 7<sup>th</sup> edition and the 8<sup>th</sup> edition.

Supplementary Table 1: Univariate Cox regression analysis result for clinical & pathological N (cN /pN) stages( MST,median survival time).

| 7 <sup>th</sup> /8 <sup>th</sup> cN | N       | Events  | MST(m) | HR             | P-value |
|-------------------------------------|---------|---------|--------|----------------|---------|
| N0                                  | 225,892 | 137,423 | 26     | -              | -       |
| N1                                  | 56,532  | 45,387  | 11     | N1 vs. N0:1.8  | < 0.001 |
| N2                                  | 205,215 | 178,778 | 8      | N2 vs. N1:1.3  | < 0.001 |
| N3                                  | 80,205  | 72,098  | 7      | N3 vs. N2: 1.1 | < 0.001 |
| 7 <sup>th</sup> /8 <sup>th</sup> pN | N       | Events  | MST(m) | HR             | P-value |
| N0                                  | 134,941 | 56,338  | 75     | -              | -       |
| N1                                  | 30,025  | 18,303  | 34     | N1 vs. N0: 1.8 | < 0.001 |
| N2                                  | 34,990  | 26,815  | 17     | N2 vs. N1:1.7  | < 0.001 |
| N3                                  | 8,796   | 7,848   | 8      | N3 vs. N2:1.8  | < 0.001 |
